# Supplementary material for: Immediate and Midterm Cardiac Remodeling After Surgical Pulmonary Valve Replacement in Adults With Repaired Tetralogy of Fallot: A Prospective Cardiovascular Magnetic Resonance and Clinical Study
Source: PubMed Central journal article supplement (PMC5662153; doi:10.1161/circulationaha.117.027402), 2017-10-30
Supplement: cir-136-1703-s001.pdf [file cir-136-1703-s001.pdf]

## SUPPLEMENTAL MATERIAL

**Supplementary Table 1:** Baseline CMR and cardiopulmonary exercise test data for deceased study patients

| Patient | Age<br>(years) | Gender | <u>Baseline CMR Data</u>       |                                |             |             |            |                |                          | <u>Cardiopulmonary Exercise Test Data</u> |                                     |                           |                   |
|---------|----------------|--------|--------------------------------|--------------------------------|-------------|-------------|------------|----------------|--------------------------|-------------------------------------------|-------------------------------------|---------------------------|-------------------|
|         |                |        | RVEDVi<br>(ml/m <sup>2</sup> ) | RVESVi<br>(ml/m <sup>2</sup> ) | RVEF<br>(%) | LVEF<br>(%) | PRF<br>(%) | RV LGE score * | RVOT scar length<br>(mm) | Peak VO <sub>2</sub><br>(ml/kg/min)       | % predicted<br>peak VO <sub>2</sub> | VE/VCO <sub>2</sub> slope | AT<br>(ml/kg/min) |
| 1       | 43             | Female | 131.2                          | 71.3                           | 42          | 50          | 33.3       | 6              | 45                       | 8.0                                       | 39                                  | 55                        | 7.2               |
| 2       | 24             | Male   | 179.2                          | 78.4                           | 56          | 60          | 43.6       | 4              | 36                       | 28.1                                      | 60                                  | 29                        | 16.3              |
| 3       | 36             | Female | 148.6                          | 84.9                           | 43          | 66          | 33.8       | 6              | 55                       | 12.5                                      | 53                                  | 53                        | 8.6               |

\* RV LGE score (no insertion points)

EDVi, indexed end-diastolic volume; EF, ejection fraction; ESVi, indexed end-systolic volume; LGE, late gadolinium enhancement; LV, left ventricle; PRF, pulmonary regurgitant fraction; RV, right ventricle; RVOT, right ventricular outflow tra

**Supplementary Table 2:** Year on year comparison of study participants with remaining patients with rTOF who underwent PVR 2005-2009 demonstrating lack of recruitment bias

| Patients with rTOF                | 2005     |           |      | 2006      |           |      | 2007     |           |             | 2008      |           |      | 2009     |           |             |
|-----------------------------------|----------|-----------|------|-----------|-----------|------|----------|-----------|-------------|-----------|-----------|------|----------|-----------|-------------|
|                                   | n = 19   |           |      | n = 19    |           |      | n = 26   |           |             | n = 25    |           |      | n = 27   |           |             |
|                                   | Study    | Non-Study | p    | Study     | Non-Study | p    | Study    | Non-Study | p           | Study     | Non-Study | p    | Study    | Non-Study | p           |
| Age, years                        | 38.3±8.5 | 34.2±16.6 | 0.63 | 32.1±11.5 | 31.0±10.0 | 0.85 | 34.1±7.9 | 30.3±10.3 | 0.32        | 34.3±13.0 | 27.3±8.8  | 0.12 | 38.2±9.9 | 30.8±9.2  | 0.06        |
| Gender, male/female               | 6/8      | 2/3       | 1.00 | 5/9       | 3/2       | 0.60 | 9/1      | 7/9       | 0.04        | 6/3       | 10/6      | 1.00 | 8/3      | 7/9       | 0.24        |
| Symptoms (NYHA≥2), n              | 9        | 2         | 1.00 | 9         | 2         | 1.00 | 8        | 12        | 0.56        | 5         | 6         | 1.00 | 5        | 4         | 1.00        |
| QRS duration, ms                  | 149±29   | 113±21    | 0.06 | 160±22    | 178±2     | 0.28 | 148±26   | 147±32    | 0.92        | 160±13    | 162±25    | 0.84 | 165±9    | 144±32    | 0.07        |
| <i>CMR</i>                        | n = 14   | n=3       |      | n = 14    | n = 3     |      | n = 10   | n = 12    |             | n = 9     | n = 11    |      | n = 11   | n=12      |             |
| RVEDVi, ml/m <sup>2</sup>         | 161±57   | 218±158   | 0.60 | 157±37    | 165±71    | 0.87 | 163±47   | 140±65    | 0.36        | 153±25    | 168±61    | 0.48 | 148±30   | 163±28    | 0.24        |
| RVESVi, ml/m <sup>2</sup>         | 91±38    | 134±120   | 0.60 | 76±19     | 85±39     | 0.55 | 90±30    | 81±47     | 0.62        | 85±17     | 101±50    | 0.37 | 81±25    | 81±18     | 0.99        |
| RVSVi, ml/m <sup>2</sup>          | 71±21    | 84±45     | 0.67 | 75±23     | 79±32     | 0.79 | 73±26    | 58±23     | 0.17        | 68±23     | 67±23     | 0.98 | 67±15    | 81±13     | <b>0.02</b> |
| RVEF, %                           | 45±5     | 42±19     | 0.84 | 48±10     | 48±3      | 0.99 | 45±8     | 43±9      | 0.64        | 44±11     | 41±9      | 0.52 | 46±8     | 50±5      | 0.1         |
| LVEDVi, ml/m <sup>2</sup>         | 73±16    | 55±53     | 0.62 | 76±22     | 91±19     | 0.30 | 77±21    | 69±11     | 0.28        | 82±19     | 77±23     | 0.64 | 74±21    | 82±18     | 0.37        |
| LVESVi, ml/m <sup>2</sup>         | 29±11    | 20±22     | 0.31 | 34±19     | 34±10     | 0.94 | 33±13    | 30±10     | 0.55        | 38±13     | 34±13     | 0.46 | 32±18    | 31±11     | 0.91        |
| LVSVi, ml/m <sup>2</sup>          | 45±8     | 35±31     | 0.63 | 43±11     | 57±10     | 0.05 | 44±10    | 36±12     | 0.12        | 45±13     | 44±14     | 0.84 | 44±10    | 51±10     | 0.12        |
| LVEF, %                           | 62±7     | 66±11     | 0.54 | 61±8      | 63±4      | 0.64 | 58±8     | 58±8      | 0.93        | 55±12     | 57±8      | 0.64 | 61±11    | 62±7      | 0.68        |
| LVMi, g/m <sup>2</sup>            | 63±15    | 81±47     | 0.68 | 60±14     | 72±26     | 0.25 | 78±16    | 59±16     | <b>0.02</b> | 72±20     | 60±15     | 0.15 | 67±16    | 58±11     | 0.14        |
| Pulmonary regurgitant fraction, % | 38±9     | 50±6      | 0.05 | 45±10     | 31±19     | 0.09 | 39±7     | 39±10     | 0.97        | 36±9      | 40±16     | 0.55 | 37±17    | 42±5      | 0.34        |

**Supplementary Table 3:** Univariable Cox regression analysis of clinical variables against clinical outcomes of **(A)** death, **(B)** VT **(C)** death and/or VT **(D)** atrial arrhythmias and **(E)** combined composite endpoint of death, VT and/or atrial arrhythmias.

| Variable                              | <b>(A) Death</b> |             |             | <b>(B) VT</b> |             |         | <b>(C) Death and/or VT</b> |             |             | <b>(D) Atrial Arrhythmia</b> |             |             | <b>(E) Composite Endpoint</b> |             |         |
|---------------------------------------|------------------|-------------|-------------|---------------|-------------|---------|----------------------------|-------------|-------------|------------------------------|-------------|-------------|-------------------------------|-------------|---------|
|                                       | HR               | 95% CI      | p value     | HR            | 95% CI      | p value | HR                         | 95% CI      | p value     | HR                           | 95% CI      | p value     | HR                            | 95% CI      | p value |
| Age at PVR, years                     | 1.01             | 0.92 - 1.12 | 0.81        | 1.03          | 0.95 - 1.13 | 0.47    | 1.03                       | 0.96 - 1.10 | 0.47        | 1.06                         | 1.00 - 1.13 | <b>0.04</b> | 1.03                          | 0.99 - 1.09 | 0.18    |
| Age at repair, years                  | 0.95             | 0.74 - 1.22 | 0.69        | 1.03          | 0.91 - 1.17 | 0.65    | 1.01                       | 0.90 - 1.14 | 0.83        | 1.07                         | 1.01 - 1.14 | <b>0.03</b> | 1.05                          | 0.99 - 1.12 | 0.13    |
| ECG QRS duration, ms                  | 1.02             | 0.97 - 1.07 | 0.45        | 1.03          | 0.99 - 1.07 | 0.15    | 1.03                       | 0.99 - 1.06 | 0.10        | 1.03                         | 1.00 - 1.05 | <b>0.05</b> | 1.02                          | 1.00 - 1.04 | 0.11    |
| <b>CMR</b>                            |                  |             |             |               |             |         |                            |             |             |                              |             |             |                               |             |         |
| RVEDVi, ml/m <sup>2</sup>             | 1.00             | 0.97 - 1.03 | 0.89        | 1.00          | 0.99 - 1.02 | 0.68    | 1.00                       | 0.99 - 1.02 | 0.78        | 1.00                         | 0.99 - 1.01 | 0.77        | 1.00                          | 0.99 - 1.01 | 0.74    |
| RVESVi, ml/m <sup>2</sup>             | 1.01             | 0.98 - 1.05 | 0.52        | 1.01          | 0.99 - 1.04 | 0.33    | 1.01                       | 0.99 - 1.04 | 0.28        | 1.00                         | 0.98 - 1.02 | 0.87        | 1.00                          | 0.98 - 1.02 | 0.83    |
| RVEF, %                               | 0.85             | 0.74 - 0.98 | <b>0.03</b> | 0.86          | 0.73 - 1.01 | 0.07    | 0.86                       | 0.77 - 0.96 | <b>0.01</b> | 0.92                         | 0.84 - 1.01 | 0.09        | 0.93                          | 0.86 - 1.00 | 0.06    |
| RVMi, g/m <sup>2</sup>                | 0.96             | 0.91 - 1.01 | 0.09        | 0.97          | 0.91 - 1.03 | 0.26    | 0.99                       | 0.94 - 1.04 | 0.59        | 1.00                         | 0.96 - 1.04 | 0.96        | 0.98                          | 0.95 - 1.02 | 0.36    |
| LVEDVi, ml/m <sup>2</sup>             | 0.98             | 0.92 - 1.04 | 0.44        | 1.02          | 0.97 - 1.06 | 0.50    | 1.01                       | 0.97 - 1.04 | 0.81        | 1.00                         | 0.97 - 1.03 | 0.74        | 1.00                          | 0.97 - 1.02 | 0.84    |
| LVESVi, ml/m <sup>2</sup>             | 0.96             | 0.86 - 1.06 | 0.37        | 0.99          | 0.90 - 1.08 | 0.75    | 0.98                       | 0.92 - 1.05 | 0.56        | 1.01                         | 0.95 - 1.06 | 0.82        | 1.00                          | 0.95 - 1.04 | 0.87    |
| LVEF, %                               | 1.03             | 0.91 - 1.18 | 0.68        | 1.11          | 0.96 - 1.29 | 0.16    | 1.06                       | 0.95 - 1.18 | 0.29        | 0.96                         | 0.88 - 1.04 | 0.30        | 1.00                          | 0.93 - 1.07 | 0.89    |
| LVMi, g/m <sup>2</sup>                | 0.97             | 0.91 - 1.04 | 0.41        | 1.02          | 0.97 - 1.08 | 0.45    | 1.01                       | 0.96 - 1.06 | 0.75        | 1.00                         | 0.97 - 1.04 | 0.96        | 1.00                          | 0.97 - 1.03 | 0.97    |
| RAAi, cm <sup>2</sup> /m <sup>2</sup> | 1.10             | 0.83 - 1.45 | 0.52        | 1.02          | 0.81 - 1.29 | 0.85    | 1.09                       | 0.90 - 1.31 | 0.38        | 1.03                         | 0.89 - 1.18 | 0.73        | 1.00                          | 0.88 - 1.14 | 0.96    |
| LAAi, cm <sup>2</sup> /m <sup>2</sup> | 0.83             | 0.52 - 1.33 | 0.45        | 0.93          | 0.60 - 1.45 | 0.75    | 0.91                       | 0.65 - 1.28 | 0.60        | 0.95                         | 0.72 - 1.24 | 0.68        | 0.92                          | 0.72 - 1.16 | 0.47    |
| Akinetic RVOT length, mm              | 0.95             | 0.87 - 1.04 | 0.28        | 0.99          | 0.92 - 1.07 | 0.88    | 0.98                       | 0.92 - 1.04 | 0.44        | 1.03                         | 0.99 - 1.07 | 0.18        | 1.01                          | 0.98 - 1.05 | 0.52    |
| RV LGE score                          | 0.92             | 0.60 - 1.41 | 0.70        | 1.21          | 0.91 - 1.61 | 0.18    | 1.09                       | 0.85 - 1.39 | 0.51        | 1.20                         | 1.01 - 1.43 | <b>0.04</b> | 1.15                          | 0.98 - 1.34 | 0.10    |
| RVOT scar length                      | 1.02             | 0.96 - 1.08 | 0.59        | 1.02          | 0.96 - 1.08 | 0.47    | 1.01                       | 0.97 - 1.06 | 0.62        | 1.02                         | 0.98 - 1.05 | 0.30        | 1.01                          | 0.98 - 1.04 | 0.39    |
| <b>CPEX</b>                           |                  |             |             |               |             |         |                            |             |             |                              |             |             |                               |             |         |
| Peak VO <sub>2</sub> , ml/kg/min      | 0.81             | 0.67 - 0.98 | <b>0.03</b> | 1.03          | 0.86 - 1.22 | 0.78    | 0.93                       | 0.82 - 1.06 | 0.30        | 0.95                         | 0.85 - 1.06 | 0.36        | 0.98                          | 0.89 - 1.07 | 0.58    |
| VE/VCO <sub>2</sub> slope             | 1.05             | 1.00 - 1.11 | 0.08        | 1.02          | 0.95 - 1.10 | 0.55    | 1.03                       | 0.98 - 1.08 | 0.19        | 1.04                         | 1.00 - 1.08 | 0.09        | 1.03                          | 0.99 - 1.07 | 0.10    |
| Ventilatory threshold, ml/kg/min      | 0.78             | 0.59 - 1.03 | 0.08        | 0.98          | 0.77 - 1.26 | 0.88    | 0.90                       | 0.75 - 1.08 | 0.27        | 0.89                         | 0.76 - 1.05 | 0.16        | 0.90                          | 0.79 - 1.03 | 0.14    |
